# Supplementary material for: Novel POLE mutations identified in patients with IMAGE-I syndrome cause aberrant subcellular localisation and protein degradation in the nucleus
Source: HighWire-hosted journal article supplement (doi:10.1136/jmedgenet-2021-108300), 2022-05-09
Supplement: jmedgenet-2021-108300supp001_data_supplement.pdf [file jmedgenet-2021-108300supp001_data_supplement.pdf]

Supplemental Table 1 List of primers.

|                          | Target               | Forward primer (5'- 3') | Reverse primer (5'- 3') |
|--------------------------|----------------------|-------------------------|-------------------------|
| Figure 2A                | POLE cDNA exon 12-13 | ACGGTCTGAGCATGCAGC      | CAGGAAGGTAAGTGTCCCT     |
| Figure 2B                | POLE minigene        | AGCAGAGCTCGTTTAGTGAAC   | AATCCGTAAGTGCTTTTGGGA   |
| Supplemental<br>Figure 1 | POLE cDNA exon 1-7   | GCTCCATGTCTCTGAGGA      | GTTGTCCAAGTGGTCAGC      |
|                          | POLE cDNA exon 6-9   | ACAGGGAGCAGGATCAC       | AATCTGGTCTGTCTCAGC      |
|                          | POLE cDNA exon 8-14  | GCCGAGATGACCTTGTGTA     | AAGTGGCGACAGCATCTG      |
|                          | POLE cDNA exon 13-17 | GAAGAGGGACAGTTACCTTC    | AGGCAAGCTTGCTCTTAAT     |
|                          | POLE cDNA exon 16-21 | GCGGGTTGAGAAGACCTT      | AGGAGTTCAGGATGCACT      |
|                          | POLE cDNA exon 21-26 | AAGCGCTGCAAGAACATG      | CAGATGAGCTCGAATAGCTC    |
|                          | POLE cDNA exon 25-29 | GAGCTCAAGGGCTTTGAG      | TTTGACACGTGGCACTGG      |
|                          | POLE cDNA exon 28-32 | GGACTACTACATTGAGCGGC    | AAGTCACTGCCAACGAGC      |
|                          | POLE cDNA exon 31-34 | AAGAAGAAGTGGCAGCTG      | CTCCCGAAGAGCGCTTTGT     |
|                          | POLE cDNA exon 34-38 | AAACAGCTGGTGAGGCAC      | CTCTGGTAGGTTCCCAATG     |
|                          | POLE cDNA exon 37-41 | CAACTATGGGGTCCTGGA      | CAGAGGATGATGCGGTTG      |
|                          | POLE cDNA exon 40-44 | CATCTATGCAGACAACCAGG    | CTCCTGGGAGAGCTGGCT      |
|                          | POLE cDNA exon 43-46 | CAACGTGGAGGATTTACTGG    | GACCTCAGGAAGCACGTAG     |
|                          | POLE cDNA exon 45-49 | TGCCCTGGAGTTCATCAA      | AGCTGTGGGTTCTTCTGCA     |

Supplemental Table 2 Summary of laboratory data in P1 and P2.

|                                         | P1    | P2     |
|-----------------------------------------|-------|--------|
| White blood cells (/μL)                 | 8,900 | 10,300 |
| Neutrophils (/μL)                       | 2,940 | 6,800  |
| Lymphocytes (/μL)                       | 5,250 | 2,470  |
| Eosinophils (/μL)                       | 0     | 210    |
| Basophils (/μL)                         | 0     | 100    |
| Monocytes (/μL)                         | 450   | 720    |
| Red blood cells (x 10 <sup>6</sup> /μL) | 3.31  | 3.39   |
| Hemoglobin (mg/dL)                      | 11.1  | 13.6   |
| Platelets (x 10 <sup>3</sup> /μL)       | 227   | 422    |
| Lymphocyte subsets                      |       |        |
| CD4 (%)                                 | 27.2  | 37.2   |
| CD8 (%)                                 | 52.3  | 29.6   |
| CD4/CD8                                 | 0.5   | 1.3    |
| CD3 (%)                                 | 81.5  | 81.2   |
| CD19 (%)                                | 14.0  | 6.3    |
| CD56 (%)                                | 1.4   | 3.6    |
| Immunoglobulin levels                   |       |        |
| IgG (mg/dL)                             | 1,459 | 2,079  |
| IgA (mg/dL)                             | 88    | 685    |
| IgM (mg/dL)                             | 42    | 81     |

## Supplemental Figure 1

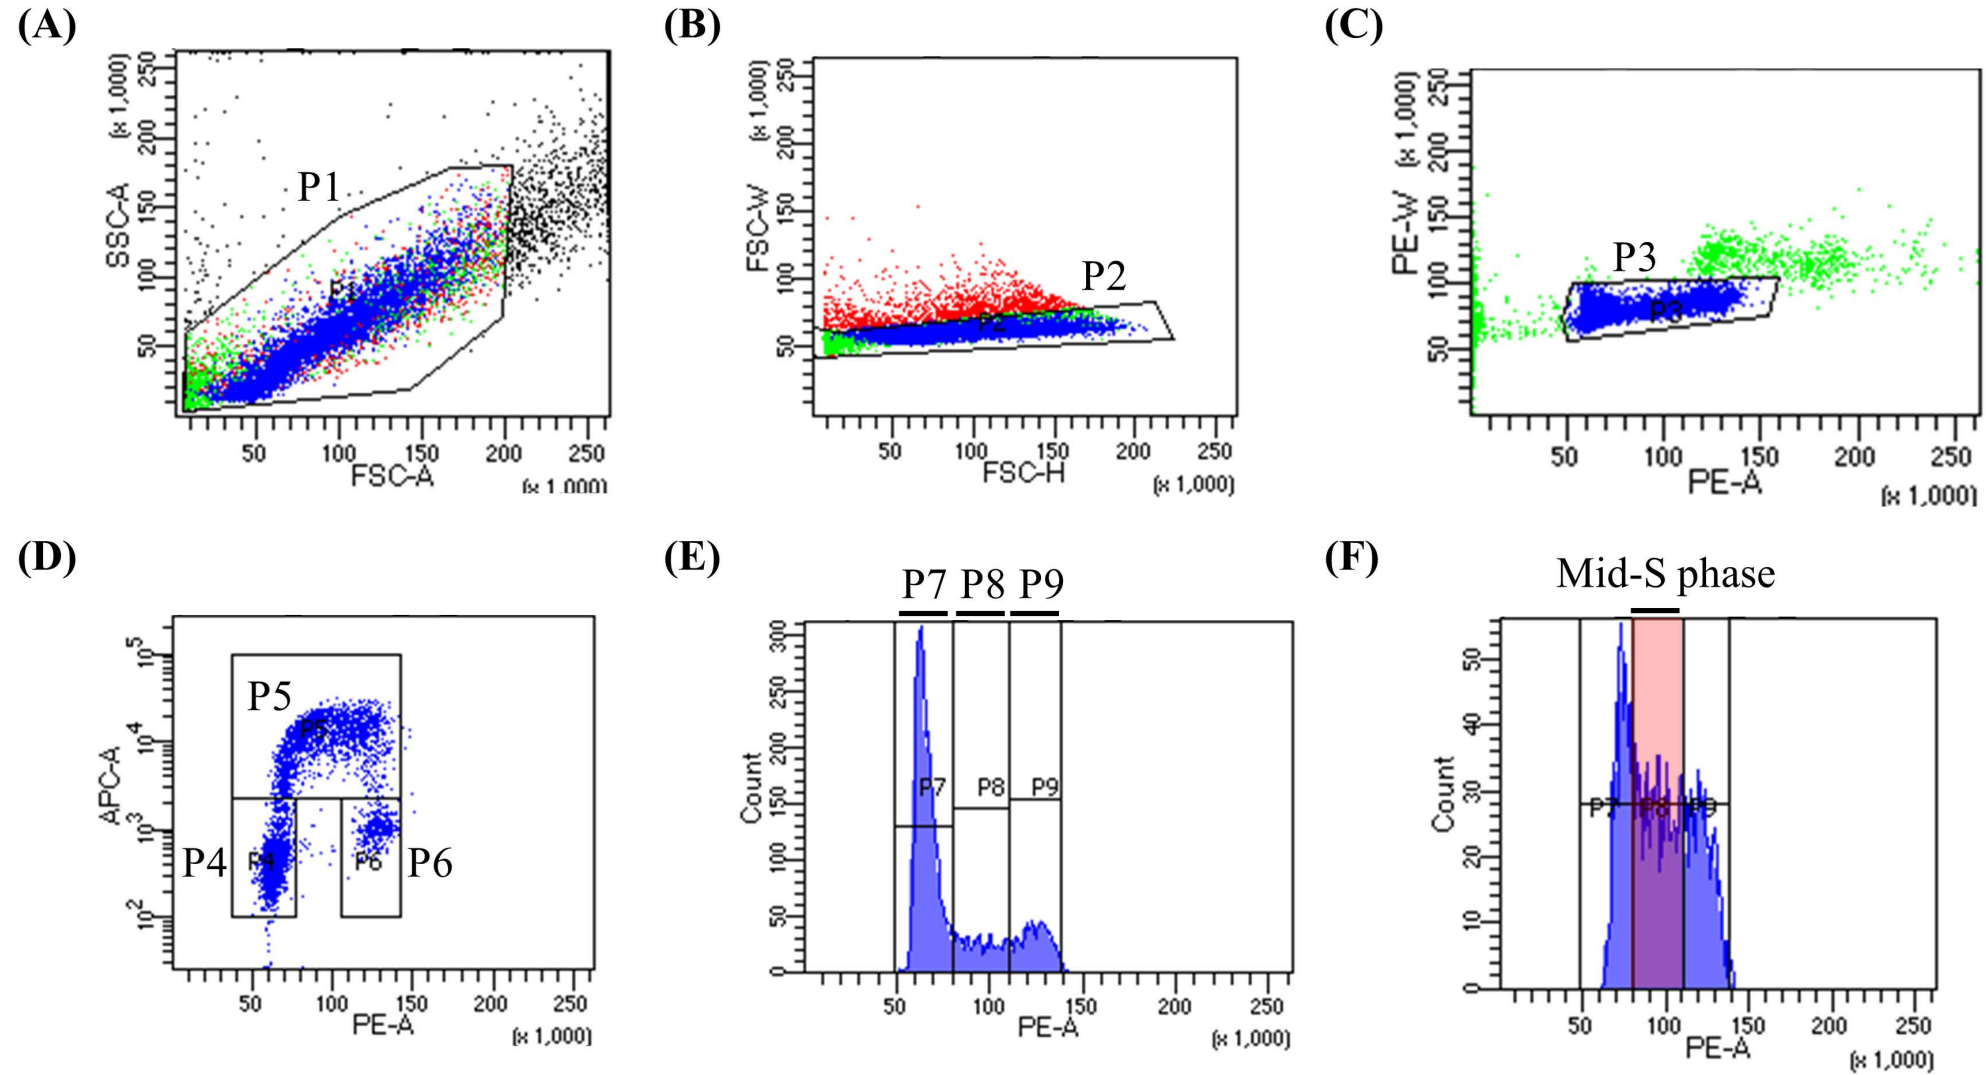

## Supplemental Figure 2

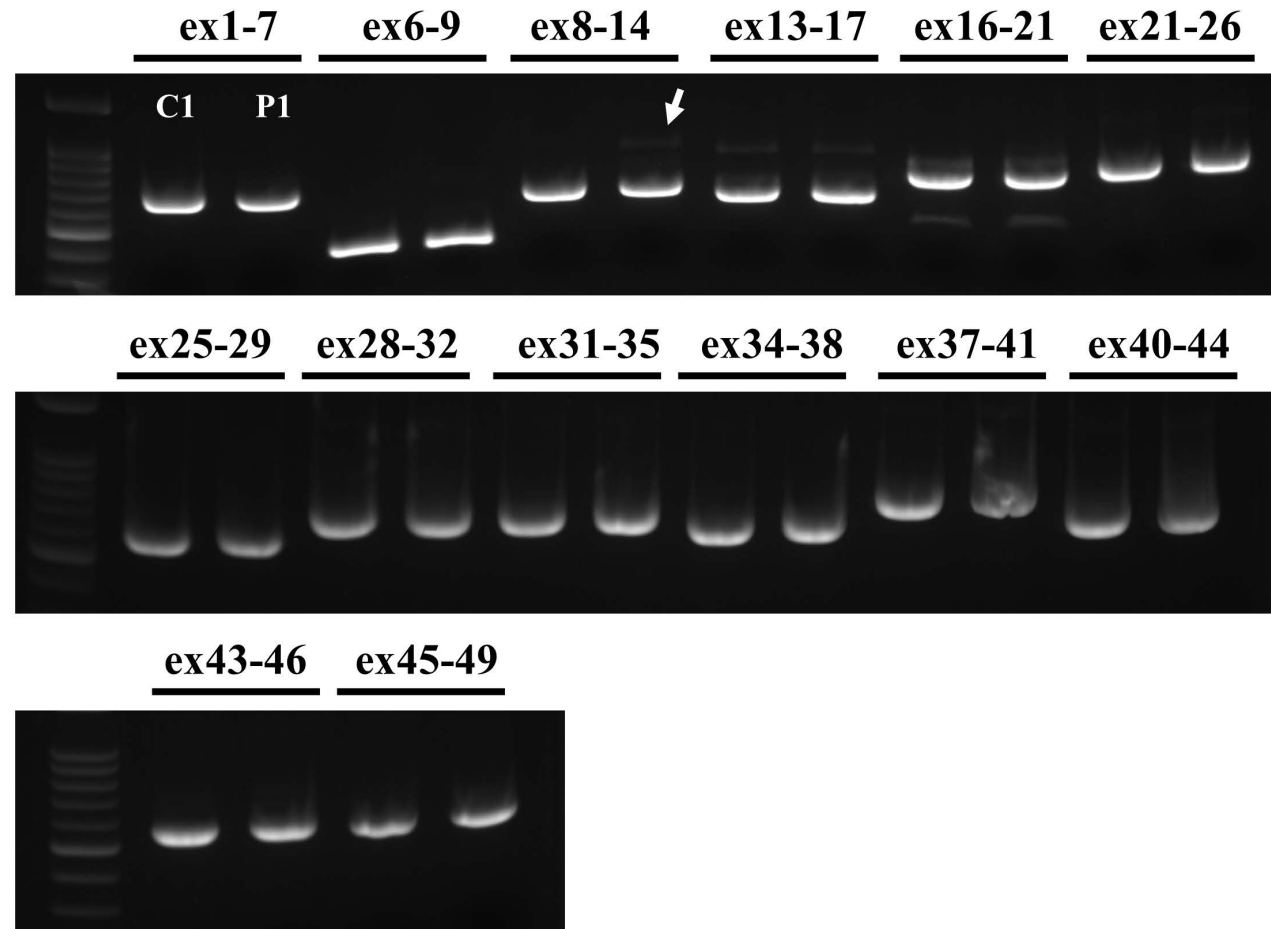

### Supplemental Figure 3

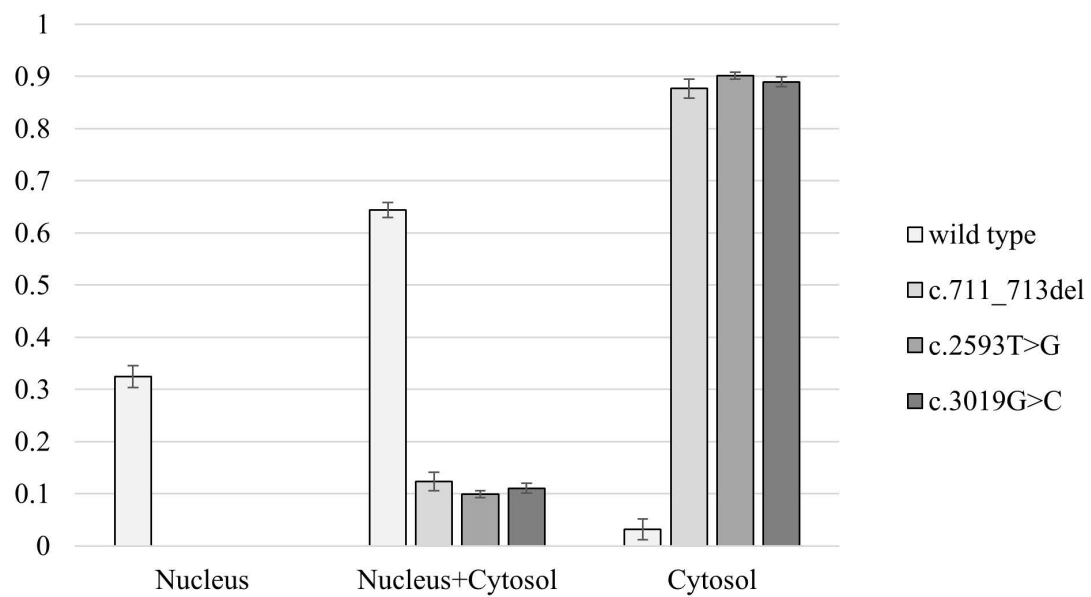

## Supplemental Figure 4

|                          |                     |     |                       |     |           |     |                                       |
|--------------------------|---------------------|-----|-----------------------|-----|-----------|-----|---------------------------------------|
| Homo sapiens             | V I T D E E - E T S | K K | I A D Q L D N I V D M | R   | E Y D V   | P Y | H I R L S I D L K I H V A             |
| Patient 1                | V I T D E E - E T S | K K | I A D Q L D N I V D M | R   | E Y D V   | P Y | H I R L S I D L N - H V A             |
| Felis catus              | V V V D E E - E A S | K K | V T D Q L D N I V D M | R   | E Y D V   | P Y | H I R L S I D L K I H A A             |
| Mus musculus             | V I T D E D - E T S | K K | I A D Q L D N I V D M | R   | E Y D V   | P Y | H I R L S I D L R I H V A             |
| Gallus gallus            | L T T S E E - G A S | K K | V T N Q M D N I V D M | R   | E Y D V   | P Y | H M R L S I D L K I H V A             |
| Xenopus tropicalis       | M G A E E E - G P S | K K | I S D Q M E N I V D M | R   | E Y D V   | P Y | H V R V S I D L K I H V A             |
| Danio rerio              | V V T E D E G G S S | K K | M T E Q L D N I L D M | R   | E Y D V   | P Y | H V R V S I D L K I H V A             |
| Drosophila melanogaster  | A G S E D - A T L G | K R | Q Q D Y M D C I V D I | R   | E H D V   | P Y | H V R V S I D L R I F C G             |
| Saccharomyces cerevisiae | - - - - - A N G     | S E | K V D A               | K H | L I E D I | R   | E Y D V P Y H V R V S I D K D I R V G |
